# Supplementary material
Source: PubMed Central journal article supplement (PMC5997268)
Supplement: NIHMS915984-supplement-Supplemental_File.pdf [file NIHMS915984-supplement-Supplemental_File.pdf]

## Electrophysiological evidence for the interaction of prosody and thematic fit during sentence comprehension

### Supplementary Material

<http://www.tandfonline.com/doi/full/10.1080/23273798.2017.1390143>

Below is a figure showing all 12 electrode sites used in our analyses of the CPS component at the prosodic break in sentences with congruent prosody (Pr+TF+ vs. Pr-TF+; Pr+TF- vs. Pr-TF-).

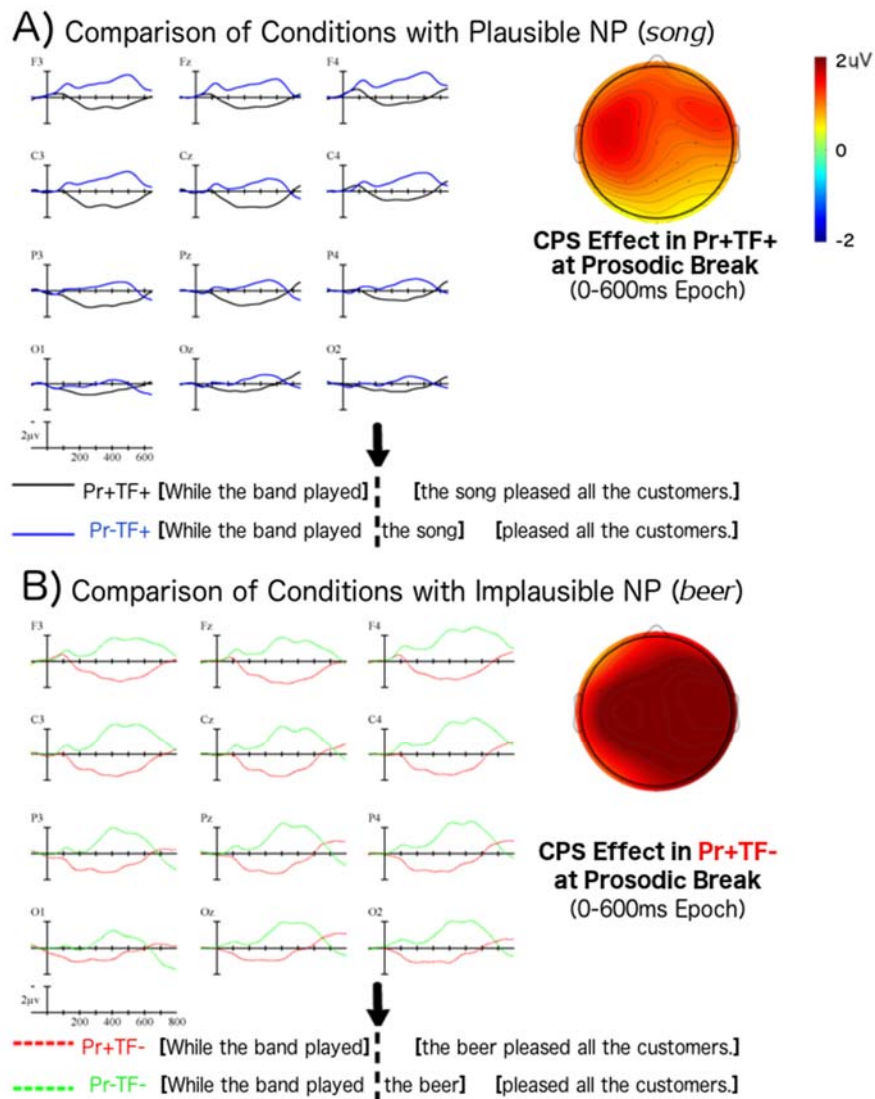

Figure S1. CPS effects at the Prosodic Break in Sentences with Congruent Prosody. Grand Average ERPs across 12 electrode sites used in the analysis at subordinate verb (*played*) offset corresponding to prosodic break in sentences with congruent prosody (Pr+TF+ and Pr+TF-). A) CPS at prosodic break in Pr+TF+, compared to Pr-TF+ sentences without a prosodic break at this point and B) CPS at prosodic break in Pr+TF-, compared to Pr-TF- sentences without a prosodic break at this point. The voltage maps show topographical distribution of CPS effects across the scalp based on the difference waveforms (congruent – incongruent prosody) ([Pr+TF+] – [Pr-TF+] in

A; [Pr+TF-] – [Pr+TF-] in B) in the 0-600ms epoch. In both comparisons the prosodic break elicits a significant CPS effect. Waveforms were low pass filtered at 5 Hz for presentation purposes only.

Additionally, below is a figure showing all 12 electrode sites used in our analyses at the temporarily ambiguous NP (*song/beer*) in all four experimental sentences.

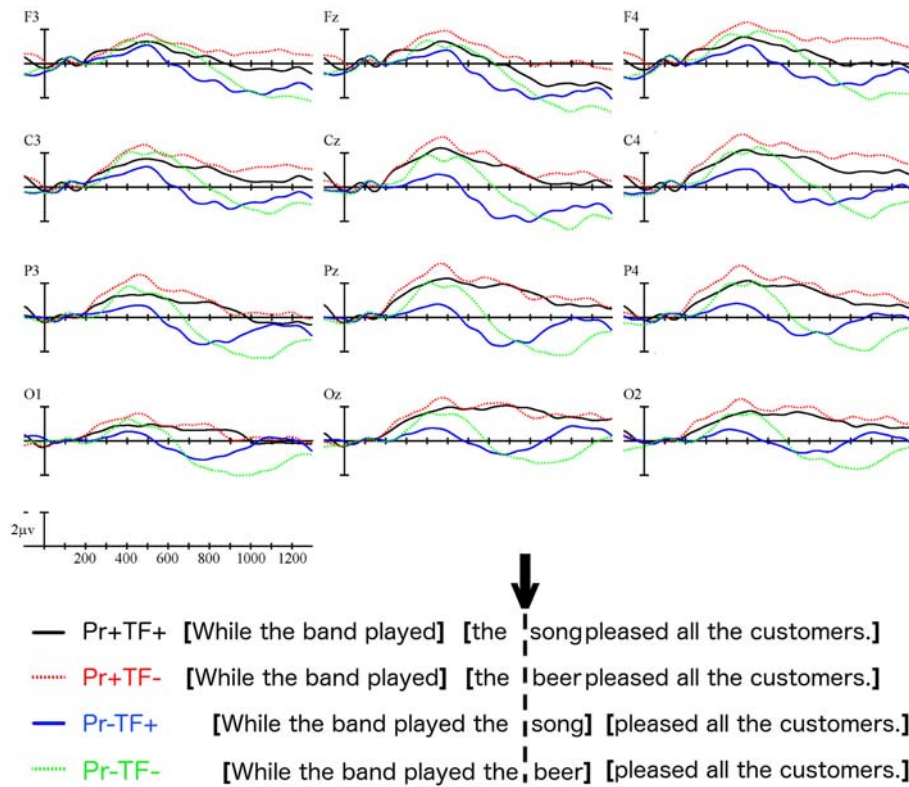

Figure S2. Grand average ERPs at the temporarily ambiguous NP (*song/beer*) across 12 electrode sites used in analysis. Waveforms were low pass filtered at 5 Hz for presentation purposes only.

Table S1. Experimental Sentences

| No. | Set No. | Condition | Sentence                                                                    |
|-----|---------|-----------|-----------------------------------------------------------------------------|
| 1   | 1       | Pr+TF+    | [While the band played] [the song pleased all the customers.]               |
| 2   | 1       | Pr+TF-    | [While the band played] [the beer pleased all the customers.]               |
| 3   | 1       | Pr-TF+    | [While the band played the song] [pleased all the customers.]               |
| 4   | 1       | Pr-TF-    | [While the band played the beer] [pleased all the customers.]               |
| 5   | 2       | Pr+TF+    | [As the men drank] [the beer pleased everybody very much.]                  |
| 6   | 2       | Pr+TF-    | [As the men drank] [the song pleased everybody very much.]                  |
| 7   | 2       | Pr-TF+    | [As the men drank the beer] [pleased everybody very much.]                  |
| 8   | 2       | Pr-TF-    | [As the men drank the song] [pleased everybody very much.]                  |
| 9   | 3       | Pr+TF+    | [As the window-cleaner called] [the housewife started to shake alarmingly.] |
| 10  | 3       | Pr+TF-    | [As the window-cleaner called] [the ladder started to shake alarmingly.]    |
| 11  | 3       | Pr-TF+    | [As the window-cleaner called the housewife] [started to shake alarmingly.] |
| 12  | 3       | Pr-TF-    | [As the window-cleaner called the ladder] [started to shake alarmingly.]    |
| 13  | 4       | Pr+TF+    | [While the child climbed] [the ladder fell to the ground.]                  |
| 14  | 4       | Pr+TF-    | [While the child climbed] [the housewife fell to the ground.]               |
| 15  | 4       | Pr-TF+    | [While the child climbed the ladder] [fell to the ground.]                  |
| 16  | 4       | Pr-TF-    | [While the child climbed the housewife] [fell to the ground.]               |
| 17  | 5       | Pr+TF+    | [While the neighbor visited] [the boy passed by the house.]                 |
| 18  | 5       | Pr+TF-    | [While the neighbor visited] [the car passed by the house.]                 |
| 19  | 5       | Pr-TF+    | [While the neighbor visited the boy] [passed by the house.]                 |
| 20  | 5       | Pr-TF-    | [While the neighbor visited the car] [passed by the house.]                 |
| 21  | 6       | Pr+TF+    | [As the driver parked] [the car made a loud noise.]                         |
| 22  | 6       | Pr+TF-    | [As the driver parked] [the boy made a loud noise.]                         |
| 23  | 6       | Pr-TF+    | [As the driver parked the car] [made a loud noise.]                         |
| 24  | 6       | Pr-TF-    | [As the driver parked the boy] [made a loud noise.]                         |
| 25  | 7       | Pr+TF+    | [While the woman drank] [the coffee looked very nice indeed.]               |
| 26  | 7       | Pr+TF-    | [While the woman drank] [the flowers looked very nice indeed.]              |
| 27  | 7       | Pr-TF+    | [While the woman drank the coffee] [looked very nice indeed.]               |
| 28  | 7       | Pr-TF-    | [While the woman drank the flowers] [looked very nice indeed.]              |
| 29  | 8       | Pr+TF+    | [As the girl painted] [the flowers smelled very fresh indeed.]              |
| 30  | 8       | Pr+TF-    | [As the girl painted] [the coffee smelled very fresh indeed.]               |
| 31  | 8       | Pr-TF+    | [As the girl painted the flowers] [smelled very fresh indeed.]              |
| 32  | 8       | Pr-TF-    | [As the girl painted the coffee] [smelled very fresh indeed.]               |
| 33  | 9       | Pr+TF+    | [As the woman called] [the puppy fell to the ground.]                       |
| 34  | 9       | Pr+TF-    | [As the woman called] [the ice-cream fell to the ground.]                   |

|            |                |                  |                                                                        |
|------------|----------------|------------------|------------------------------------------------------------------------|
| 35         | 9              | Pr-TF+           | [As the woman called the puppy] [fell to the ground.]                  |
| 36         | 9              | Pr-TF-           | [As the woman called the ice-cream] [fell to the ground.]              |
| 37         | 10             | Pr+TF+           | [While the child ate] [the ice-cream dropped to the floor.]            |
| 38         | 10             | Pr+TF-           | [While the child ate] [the puppy dropped to the floor.]                |
| 39         | 10             | Pr-TF+           | [While the child ate the ice-cream] [dropped to the floor.]            |
| 40         | 10             | Pr-TF-           | [While the child ate the puppy] [dropped to the floor.]                |
| <b>No.</b> | <b>Set No.</b> | <b>Condition</b> | <b>Sentence</b>                                                        |
| 41         | 11             | Pr+TF+           | [While the cleaner polished] [the truck was stolen by someone.]        |
| 42         | 11             | Pr+TF-           | [While the cleaner polished] [the cake was stolen by someone.]         |
| 43         | 11             | Pr-TF+           | [While the cleaner polished the truck] [was stolen by someone.]        |
| 44         | 11             | Pr-TF-           | [While the cleaner polished the cake] [was stolen by someone.]         |
| 45         | 12             | Pr+TF+           | [As the mother baked] [the cake disappeared mysteriously from sight.]  |
| 46         | 12             | Pr+TF-           | [As the mother baked] [the truck disappeared mysteriously from sight.] |
| 47         | 12             | Pr-TF+           | [As the mother baked the cake] [disappeared mysteriously from sight.]  |
| 48         | 12             | Pr-TF-           | [As the mother baked the truck] [disappeared mysteriously from sight.] |
| 49         | 13             | Pr+TF+           | [As the woman ate] [the fish shone in the sun.]                        |
| 50         | 13             | Pr+TF-           | [As the woman ate] [the tree shone in the sun.]                        |
| 51         | 13             | Pr-TF+           | [As the woman ate the fish] [shone in the sun.]                        |
| 52         | 13             | Pr-TF-           | [As the woman ate the tree] [shone in the sun.]                        |
| 53         | 14             | Pr+TF+           | [While the boy climbed] [the tree looked very beautiful indeed.]       |
| 54         | 14             | Pr+TF-           | [While the boy climbed] [the fish looked very beautiful indeed.]       |
| 55         | 14             | Pr-TF+           | [While the boy climbed the tree] [looked very beautiful indeed.]       |
| 56         | 14             | Pr-TF-           | [While the boy climbed the fish] [looked very beautiful indeed.]       |
| 57         | 15             | Pr+TF+           | [While the boy walked] [the dog got hot and smelly.]                   |
| 58         | 15             | Pr+TF-           | [While the boy walked] [the milk got hot and smelly.]                  |
| 59         | 15             | Pr-TF+           | [While the boy walked the dog] [got hot and smelly.]                   |
| 60         | 15             | Pr-TF-           | [While the boy walked the milk] [got hot and smelly.]                  |
| 61         | 16             | Pr+TF+           | [As the girl drank] [the milk disappeared from the kitchen.]           |
| 62         | 16             | Pr+TF-           | [As the girl drank] [the dog disappeared from the kitchen.]            |
| 63         | 16             | Pr-TF+           | [As the girl drank the milk] [disappeared from the kitchen.]           |
| 64         | 16             | Pr-TF-           | [As the girl drank the dog] [disappeared from the kitchen.]            |
| 65         | 17             | Pr+TF+           | [As the woman rode] [the horse raced under the bridge.]                |
| 66         | 17             | Pr+TF-           | [As the woman rode] [the boat raced under the bridge.]                 |
| 67         | 17             | Pr-TF+           | [As the woman rode the horse] [raced under the bridge.]                |
| 68         | 17             | Pr-TF-           | [As the woman rode the boat] [raced under the bridge.]                 |
| 69         | 18             | Pr+TF+           | [While the captain sailed] [the boat passed by very quickly.]          |
| 70         | 18             | Pr+TF-           | [While the captain sailed] [the horse passed by very quickly.]         |
| 71         | 18             | Pr-TF+           | [While the captain sailed the boat] [passed by very quickly.]          |
| 72         | 18             | Pr-TF-           | [While the captain sailed the horse] [passed by very quickly.]         |
| 73         | 19             | Pr+TF+           | [As the pilot flew] [the plane sounded far too loud.]                  |
| 74         | 19             | Pr+TF-           | [As the pilot flew] [the song sounded far too loud.]                   |
| 75         | 19             | Pr-TF+           | [As the pilot flew the plane] [sounded far too loud.]                  |
| 76         | 19             | Pr-TF-           | [As the pilot flew the song] [sounded far too loud.]                   |

|    |    |        |                                                             |
|----|----|--------|-------------------------------------------------------------|
| 77 | 20 | Pr+TF+ | [As the choir sang] [the song could be heard by everyone.]  |
| 78 | 20 | Pr+TF- | [As the choir sang] [the plane could be heard by everyone.] |
| 79 | 20 | Pr-TF+ | [As the choir sang the song] [could be heard by everyone.]  |
| 80 | 20 | Pr-TF- | [As the choir sang the plane] [could be heard by everyone.] |

| No. | Set No. | Condition | Sentence                                                                 |
|-----|---------|-----------|--------------------------------------------------------------------------|
| 81  | 21      | Pr+TF+    | [While Henry wrote] [the novel amused all the reporters.]                |
| 82  | 21      | Pr+TF-    | [While Henry wrote] [the dancer amused all the reporters.]               |
| 83  | 21      | Pr-TF+    | [While Henry wrote the novel] [amused all the reporters.]                |
| 84  | 21      | Pr-TF-    | [While Henry wrote the dancer] [amused all the reporters.]               |
| 85  | 22      | Pr+TF+    | [As the monk chanted] [the prayer impressed a foreign visitor.]          |
| 86  | 22      | Pr+TF-    | [As the monk chanted] [the building impressed a foreign visitor.]        |
| 87  | 22      | Pr-TF+    | [As the monk chanted the prayer] [impressed a foreign visitor.]          |
| 88  | 22      | Pr-TF-    | [As the monk chanted the building] [impressed a foreign visitor.]        |
| 89  | 23      | Pr+TF+    | [While the supporters cheered] [the team bothered the musicians.]        |
| 90  | 23      | Pr+TF-    | [While the supporters cheered] [the wind bothered the musicians.]        |
| 91  | 23      | Pr-TF+    | [While the supporters cheered the team] [bothered the musicians.]        |
| 92  | 23      | Pr-TF-    | [While the supporters cheered the wind] [bothered the musicians.]        |
| 93  | 24      | Pr+TF+    | [As the professor lectured] [the students became very restless outside.] |
| 94  | 24      | Pr+TF-    | [As the professor lectured] [the seagulls became very restless outside.] |
| 95  | 24      | Pr-TF+    | [As the professor lectured the students] [became very restless outside.] |
| 96  | 24      | Pr-TF-    | [As the professor lectured the seagulls] [became very restless outside.] |
| 97  | 25      | Pr+TF+    | [As the sergeant marched] [the squadron spotted a pile of rocks.]        |
| 98  | 25      | Pr+TF-    | [As the sergeant marched] [the raccoons spotted a pile of rocks.]        |
| 99  | 25      | Pr-TF+    | [As the sergeant marched the squadron] [spotted a pile of rocks.]        |
| 100 | 25      | Pr-TF-    | [As the sergeant marched the raccoons] [spotted a pile of rocks.]        |
| 101 | 26      | Pr+TF+    | [As the minister preached] [the sermon excited the tourists.]            |
| 102 | 26      | Pr+TF-    | [As the minister preached] [the sunrise excited the tourists.]           |
| 103 | 26      | Pr-TF+    | [As the minister preached the sermon] [excited the tourists.]            |
| 104 | 26      | Pr-TF-    | [As the minister preached the sunrise] [excited the tourists.]           |
| 105 | 27      | Pr+TF+    | [As the writer typed] [the essay lay on the ground.]                     |
| 106 | 27      | Pr+TF-    | [As the writer typed] [the bottle lay on the ground.]                    |
| 107 | 27      | Pr-TF+    | [As the writer typed the essay] [lay on the ground.]                     |
| 108 | 27      | Pr-TF-    | [As the writer typed the bottle] [lay on the ground.]                    |
| 109 | 28      | Pr+TF+    | [As the group sang] [the hymn delighted the committee.]                  |
| 110 | 28      | Pr+TF-    | [As the group sang] [the tea delighted the committee.]                   |
| 111 | 28      | Pr-TF+    | [As the group sang the hymn] [delighted the committee.]                  |
| 112 | 28      | Pr-TF-    | [As the group sang the tea] [delighted the committee.]                   |
| 113 | 29      | Pr+TF+    | [While James walked] [the dog stopped next to the courthouse.]           |
| 114 | 29      | Pr+TF-    | [While James walked] [the truck stopped next to the courthouse.]         |
| 115 | 29      | Pr-TF+    | [While James walked the dog] [stopped next to the courthouse.]           |
| 116 | 29      | Pr-TF-    | [While James walked the truck] [stopped next to the courthouse.]         |

|     |    |        |                                                                 |
|-----|----|--------|-----------------------------------------------------------------|
| 117 | 30 | Pr+TF+ | [As the picketers chanted] [the threats annoyed the neighbors.] |
| 118 | 30 | Pr+TF- | [As the picketers chanted] [the rain annoyed the neighbors.]    |
| 119 | 30 | Pr-TF+ | [As the picketers chanted the threats] [annoyed the neighbors.] |
| 120 | 30 | Pr-TF- | [As the picketers chanted the rain] [annoyed the neighbors.]    |

| No. | Set No. | Condition | Sentence                                                                      |
|-----|---------|-----------|-------------------------------------------------------------------------------|
| 121 | 31      | Pr+TF+    | [While the assistant chopped] [the steak chilled in the fridge.]              |
| 122 | 31      | Pr+TF-    | [While the assistant chopped] [the milk chilled in the fridge.]               |
| 123 | 31      | Pr-TF+    | [While the assistant chopped the steak] [chilled in the fridge.]              |
| 124 | 31      | Pr-TF-    | [While the assistant chopped the milk] [chilled in the fridge.]               |
| 125 | 32      | Pr+TF+    | [While the volunteer knitted] [the blanket was donated to the orphanage.]     |
| 126 | 32      | Pr+TF-    | [While the volunteer knitted] [the toaster was donated to the orphanage.]     |
| 127 | 32      | Pr-TF+    | [While the volunteer knitted the blanket] [was donated to the orphanage.]     |
| 128 | 32      | Pr-TF-    | [While the volunteer knitted the toaster] [was donated to the orphanage.]     |
| 129 | 33      | Pr+TF+    | [While Mary practiced] [the ballad irritated the old woman.]                  |
| 130 | 33      | Pr+TF-    | [While Mary practiced] [the sofa irritated the old woman.]                    |
| 131 | 33      | Pr-TF+    | [While Mary practiced the ballad] [irritated the old woman.]                  |
| 132 | 33      | Pr-TF-    | [While Mary practiced the sofa] [irritated the old woman.]                    |
| 133 | 34      | Pr+TF+    | [While the sitter cooked] [the meatballs were arranged neatly on a platter.]  |
| 134 | 34      | Pr+TF-    | [While the sitter cooked] [the cocktails were arranged neatly on a platter.]  |
| 135 | 34      | Pr-TF+    | [While the sitter cooked the meatballs] [were arranged neatly on a platter.]  |
| 136 | 34      | Pr-TF-    | [While the sitter cooked the cocktails] [were arranged neatly on a platter.]  |
| 137 | 35      | Pr+TF+    | [As the nanny cleaned] [the cat knocked over the sign.]                       |
| 138 | 35      | Pr+TF-    | [As the nanny cleaned] [the breeze knocked over the sign.]                    |
| 139 | 35      | Pr-TF+    | [As the nanny cleaned the cat] [knocked over the sign.]                       |
| 140 | 35      | Pr-TF-    | [As the nanny cleaned the breeze] [knocked over the sign.]                    |
| 141 | 36      | Pr+TF+    | [While the waitress practiced] [the piano was delivered to the apartment.]    |
| 142 | 36      | Pr+TF-    | [While the waitress practiced] [the envelope was delivered to the apartment.] |
| 143 | 36      | Pr-TF+    | [While the waitress practiced the piano] [was delivered to the apartment.]    |
| 144 | 36      | Pr-TF-    | [While the waitress practiced the envelope] [was delivered to the apartment.] |
| 145 | 37      | Pr+TF+    | [As Katie dusted] [the table stood in the corner.]                            |
| 146 | 37      | Pr+TF-    | [As Katie dusted] [the toddler stood in the corner.]                          |
| 147 | 37      | Pr-TF+    | [As Katie dusted the table] [stood in the corner.]                            |
| 148 | 37      | Pr-TF-    | [As Katie dusted the toddler] [stood in the corner.]                          |
| 149 | 38      | Pr+TF+    | [As the teacher lectured] [the boy entered the classroom.]                    |
| 150 | 38      | Pr+TF-    | [As the teacher lectured] [the bee entered the classroom.]                    |
| 151 | 38      | Pr-TF+    | [As the teacher lectured the boy] [entered the classroom.]                    |
| 152 | 38      | Pr-TF-    | [As the teacher lectured the bee] [entered the classroom.]                    |
| 153 | 39      | Pr+TF+    | [As the actors performed] [the play entertained the critics.]                 |
| 154 | 39      | Pr+TF-    | [As the actors performed] [the food entertained the critics.]                 |
| 155 | 39      | Pr-TF+    | [As the actors performed the play] [entertained the critics.]                 |
| 156 | 39      | Pr-TF-    | [As the actors performed the food] [entertained the critics.]                 |

|     |    |        |                                                                 |
|-----|----|--------|-----------------------------------------------------------------|
| 157 | 40 | Pr+TF+ | [As the captain steered] [the ship repelled a surprise attack.] |
| 158 | 40 | Pr+TF- | [As the captain steered] [the town repelled a surprise attack.] |
| 159 | 40 | Pr-TF+ | [As the captain steered the ship] [repelled a surprise attack.] |
| 160 | 40 | Pr-TF- | [As the captain steered the town] [repelled a surprise attack.] |

| No. | Set No. | Condition | Sentence                                                                    |
|-----|---------|-----------|-----------------------------------------------------------------------------|
| 161 | 41      | Pr+TF+    | [While Julie dug] [the hole collapsed unexpectedly.]                        |
| 162 | 41      | Pr+TF-    | [While Julie dug] [the tent collapsed unexpectedly.]                        |
| 163 | 41      | Pr-TF+    | [While Julie dug the hole] [collapsed unexpectedly.]                        |
| 164 | 41      | Pr-TF-    | [While Julie dug the tent] [collapsed unexpectedly.]                        |
| 165 | 42      | Pr+TF+    | [While Adam raced] [a motorbike was sold in a nearby store.]                |
| 166 | 42      | Pr+TF-    | [While Adam raced] [a computer was sold in a nearby store.]                 |
| 167 | 42      | Pr-TF+    | [While Adam raced a motorbike] [was sold in a nearby store.]                |
| 168 | 42      | Pr-TF-    | [While Adam raced a computer] [was sold in a nearby store.]                 |
| 169 | 43      | Pr+TF+    | [While the businessman read] [the book engaged the young teenagers.]        |
| 170 | 43      | Pr+TF-    | [While the businessman read] [the chef engaged the young teenagers.]        |
| 171 | 43      | Pr-TF+    | [While the businessman read the book] [engaged the young teenagers.]        |
| 172 | 43      | Pr-TF-    | [While the businessman read the chef] [engaged the young teenagers.]        |
| 173 | 44      | Pr+TF+    | [As Susan wrote] [the letter arrived from Paris.]                           |
| 174 | 44      | Pr+TF-    | [As Susan wrote] [the airplane arrived from Paris.]                         |
| 175 | 44      | Pr-TF+    | [As Susan wrote the letter] [arrived from Paris.]                           |
| 176 | 44      | Pr-TF-    | [As Susan wrote the airplane] [arrived from Paris.]                         |
| 177 | 45      | Pr+TF+    | [While the lawyer wrote] [the contract remained in the safety deposit box.] |
| 178 | 45      | Pr+TF-    | [While the lawyer wrote] [the heirloom remained in the safety deposit box.] |
| 179 | 45      | Pr-TF+    | [While the lawyer wrote the contract] [remained in the safety deposit box.] |
| 180 | 45      | Pr-TF-    | [While the lawyer wrote the heirloom] [remained in the safety deposit box.] |
| 181 | 46      | Pr+TF+    | [While the director smoked] [the cigar was given away as a present.]        |
| 182 | 46      | Pr+TF-    | [While the director smoked] [the statue was given away as a present.]       |
| 183 | 46      | Pr-TF+    | [While the director smoked the cigar] [was given away as a present.]        |
| 184 | 46      | Pr-TF-    | [While the director smoked the statue] [was given away as a present.]       |
| 185 | 47      | Pr+TF+    | [As the tailor sewed] [the dress disappointed the picky judges.]            |
| 186 | 47      | Pr+TF-    | [As the tailor sewed] [the wine disappointed the picky judges.]             |
| 187 | 47      | Pr-TF+    | [As the tailor sewed the dress] [disappointed the picky judges.]            |
| 188 | 47      | Pr-TF-    | [As the tailor sewed the wine] [disappointed the picky judges.]             |
| 189 | 48      | Pr+TF+    | [While Tom cooked] [the hamburger sat on the table.]                        |
| 190 | 48      | Pr+TF-    | [While Tom cooked] [the newspaper sat on the table.]                        |
| 191 | 48      | Pr-TF+    | [While Tom cooked the hamburger] [sat on the table.]                        |
| 192 | 48      | Pr-TF-    | [While Tom cooked the newspaper] [sat on the table.]                        |
| 193 | 49      | Pr+TF+    | [As Rick drove] [the scooter warmed up in the garage.]                      |
| 194 | 49      | Pr+TF-    | [As Rick drove] [the heater warmed up in the garage.]                       |
| 195 | 49      | Pr-TF+    | [As Rick drove the scooter] [warmed up in the garage.]                      |
| 196 | 49      | Pr-TF-    | [As Rick drove the heater] [warmed up in the garage.]                       |

|     |    |        |                                                              |
|-----|----|--------|--------------------------------------------------------------|
| 197 | 50 | Pr+TF+ | [As Jerry played] [the cello gathered dust in the attic.]    |
| 198 | 50 | Pr+TF- | [As Jerry played] [the painting gathered dust in the attic.] |
| 199 | 50 | Pr-TF+ | [As Jerry played the cello] [gathered dust in the attic.]    |
| 200 | 50 | Pr-TF- | [As Jerry played the painting] [gathered dust in the attic.] |

| No. | Set No. | Condition | Sentence                                                              |
|-----|---------|-----------|-----------------------------------------------------------------------|
| 201 | 51      | Pr+TF+    | [While the sailor smoked] [the cigarettes were sent to the factory.]  |
| 202 | 51      | Pr+TF-    | [While the sailor smoked] [the microwaves were sent to the factory.]  |
| 203 | 51      | Pr-TF+    | [While the sailor smoked the cigarettes] [were sent to the factory.]  |
| 204 | 51      | Pr-TF-    | [While the sailor smoked the microwaves] [were sent to the factory.]  |
| 205 | 52      | Pr+TF+    | [While Brian hunted] [the bison was prepared for dinner.]             |
| 206 | 52      | Pr+TF-    | [While Brian hunted] [the salad was prepared for dinner.]             |
| 207 | 52      | Pr-TF+    | [While Brian hunted the bison] [was prepared for dinner.]             |
| 208 | 52      | Pr-TF-    | [While Brian hunted the salad] [was prepared for dinner.]             |
| 209 | 53      | Pr+TF+    | [While the jeweler polished] [the ring glistened under the sun.]      |
| 210 | 53      | Pr+TF-    | [While the jeweler polished] [the lake glistened under the sun.]      |
| 211 | 53      | Pr-TF+    | [While the jeweler polished the ring] [glistened under the sun.]      |
| 212 | 53      | Pr-TF-    | [While the jeweler polished the lake] [glistened under the sun.]      |
| 213 | 54      | Pr+TF+    | [As Mark vacuumed] [the rug spun in the dryer.]                       |
| 214 | 54      | Pr+TF-    | [As Mark vacuumed] [the shirt spun in the dryer.]                     |
| 215 | 54      | Pr-TF+    | [As Mark vacuumed the rug] [spun in the dryer.]                       |
| 216 | 54      | Pr-TF-    | [As Mark vacuumed the shirt] [spun in the dryer.]                     |
| 217 | 55      | Pr+TF+    | [As the librarian lectured] [the children rested on the lawn.]        |
| 218 | 55      | Pr+TF-    | [As the librarian lectured] [the ducklings rested on the lawn.]       |
| 219 | 55      | Pr-TF+    | [As the librarian lectured the children] [rested on the lawn.]        |
| 220 | 55      | Pr-TF-    | [As the librarian lectured the ducklings] [rested on the lawn.]       |
| 221 | 56      | Pr+TF+    | [While Kendra parked] [the bus rusted in the junkyard.]               |
| 222 | 56      | Pr+TF-    | [While Kendra parked] [the nail rusted in the junkyard.]              |
| 223 | 56      | Pr-TF+    | [While Kendra parked the bus] [rusted in the junkyard.]               |
| 224 | 56      | Pr-TF-    | [While Kendra parked the nail] [rusted in the junkyard.]              |
| 225 | 57      | Pr+TF+    | [While the athlete ran] [the race produced an enthusiastic response.] |
| 226 | 57      | Pr+TF-    | [While the athlete ran] [the girl produced an enthusiastic response.] |
| 227 | 57      | Pr-TF+    | [While the athlete ran the race] [produced an enthusiastic response.] |
| 228 | 57      | Pr-TF-    | [While the athlete ran the girl] [produced an enthusiastic response.] |
| 229 | 58      | Pr+TF+    | [While the designer knitted] [the hat fell off the table.]            |
| 230 | 58      | Pr+TF-    | [While the designer knitted] [the lime fell off the table.]           |
| 231 | 58      | Pr-TF+    | [While the designer knitted the hat] [fell off the table.]            |
| 232 | 58      | Pr-TF-    | [While the designer knitted the lime] [fell off the table.]           |
| 233 | 59      | Pr+TF+    | [While Scott baked] [the pizza caught on fire.]                       |
| 234 | 59      | Pr+TF-    | [While Scott baked] [the mitten caught on fire.]                      |
| 235 | 59      | Pr-TF+    | [While Scott baked the pizza] [caught on fire.]                       |
| 236 | 59      | Pr-TF-    | [While Scott baked the mitten] [caught on fire.]                      |



|     |    |        |                                                                |
|-----|----|--------|----------------------------------------------------------------|
| 237 | 60 | Pr+TF+ | [While the scientist read] [the report arrived at the house.]  |
| 238 | 60 | Pr+TF- | [While the scientist read] [the mailman arrived at the house.] |
| 239 | 60 | Pr-TF+ | [While the scientist read the report] [arrived at the house.]  |
| 240 | 60 | Pr-TF- | [While the scientist read the mailman] [arrived at the house.] |

---

For examples of audio sentence stimuli please select this link:

<https://figshare.com/s/a289a138833f8ea0dff0>
